# Supplementary material
Source: PubMed Central journal article supplement (PMC4794356)
Supplement: NIHMS747708-supplement-1.pdf [file NIHMS747708-supplement-1.pdf]

**Supplemental Table 1.** Cytokines produced in tumor-conditioned media.

| <b>Fold Change over Medium Alone</b> |                  |                   |                                 |                    |
|--------------------------------------|------------------|-------------------|---------------------------------|--------------------|
| <b>Protein</b>                       | <b>E0771 TCM</b> | <b>M3-9-M TCM</b> | <b>Uniprot Accession Number</b> | <b>Entrez Gene</b> |
| Leptin                               | 10.03            | 66.77             | P41160                          | 16846              |
| Flt3 ligand                          | 6.28             | 1.5               | P49772                          | 14256              |
| IGFBP2                               | 3.62             | 3.02              | P47877                          | 16008              |
| IL-7                                 | 3.5              | 0.76              | P10168                          | 16196              |
| E selectin                           | 3.28             | 3.55              | Q00690                          | 20339              |
| IL-4                                 | 1.87             | 2.45              | P07750                          | 16189              |
| GM-CSF                               | 1.78             | 1.81              | P26955                          | 12983              |
| IL-3                                 | 1.71             | 3.1               | P01586                          | 16187              |
| IL12 p40/70                          | 1.53             | 2.65              | P43432                          | 16160              |
| AXL                                  | 1.17             | 2.6               | Q00993                          | 26362              |
| IL-6                                 | 1.07             | 0.54              | P05231                          | 16193              |
| SCF                                  | 0.86             | 1.55              | P20826                          | 17311              |
| TNF $\alpha$                         | 0.48             | 2.65              | P06804                          | 21926              |
| TPO                                  | 0.46             | 1.44              | P35419                          | 22018              |
| VEGF                                 | 0.41             | 1.71              | Q00731                          | 22339              |
