# Supplementary material
Source: PubMed Central journal article supplement (PMC4794356)
Supplement: NIHMS747708-supplement-8.pdf [file NIHMS747708-supplement-8.pdf]

**Supplementary Figure 1** Growth and metastatic timeline of E0771 BCA and M3-9-M ERMS.

A-B. Primary tumor growth was measured over time for (A) E0771 ffluc-eGFP BCA injected into the mammary fat pad or (B) M3-9-M ffluc-eGFP ERMS injected into the gastrocnemius muscle. Numbers of mice per time point are indicated above marker.

C-D. Freshly dissected lungs from E0771 ffluc-eGFP (C) or M3-9-M ffluc-eGFP (D) tumor-bearing mice were assayed for tumor-derived luminescent signal by IVIS. ( $n > 5$  mice per time point)

E. Representative IVIS images of lungs from E0771 ffluc-eGFP or M3-9-M ffluc-eGFP tumor-bearing mice. Luminescence scale bar is shown at right.

D. Immunofluorescence for GFP from lungs of mice bearing E0771 ffluc-eGFP primary tumors for 12 days (top) or 21 days (bottom). Images acquired with 63x magnification. Scale bar is  $10\mu\text{m}$ .

**Supplementary Figure 2** Analysis of the bone marrow microenvironment and CXCR4 expression on E0771 BCA Tumor cells.

A. qRT-PCR expression of *Cxcl12* relative to beta actin from total bones of HBSS control or E0771 tumor-bearing mice. ( $n=4$  for HBSS;  $n=5$  for E0771; data are presented as fold change  $\pm$  SEM)

B. Quantification of CXCR4-expressing LSK cells per milliliter of total blood in control or E0771 BCA tumor-bearing mice. ( $n=5$  mice per group)

C. Flow cytometry quantification of CXCR4 geometric mean fluorescence signal intensity on LSK cells in peripheral blood. ( $n=5$  mice per group)

D. Flow cytometry analysis of the percent of LSK cells in peripheral blood that express CXCR4. ( $n=5$  mice per group)

E. Flow cytometry evaluation of CXCR4 expression on E0771 tumor cells prior to tail-vein injection.  $*P<0.05$ ;  $**P<0.005$ ;  $***P<0.005$ .

**Supplementary Figure 3** Myeloid-derived suppressor cells localize with spontaneous metastases.

A. Representative immunofluorescence of lungs with the indicated antibodies (CD11b, Gr-1, GFP) and DAPI and imaged under 20x magnification. Scale bar is 50 $\mu$ m.

B. 63x magnification of the boxed region in (A). Scale bar is 10 $\mu$ m.

C. Representative immunofluorescence of lungs with the indicated antibodies (CD11b, and Gr-1) and DAPI and imaged under 20x magnification. “T” indicates tumor. Tumor borders are indicated with a dotted white line. “BV” indicates a blood vessel. Blood vessel borders are indicated with a dotted green line. Scale bar is 50 $\mu$ m.

**Supplementary Figure 4** Phenotypic and functionally immunosuppressive MDSCs in the primary tumor and spleen of tumor-bearing mice.

A. Representative flow cytometry gating strategy of E0771-GFP primary tumor at 12 days following tumor implantation.

B. Quantification of myeloid cells within the primary tumor 12 days following tumor implantation. ( $n=4$  primary tumors)

C. Suppression of T cell division by MDSCs isolated from either control mice spleen or E0771 primary tumor ( $n=3$  replicates per group).  $*P<0.05$ ;  $**P<0.005$ ;  $***P<0.005$ .

D. Representative flow cytometry gating strategy of control or E0771-GFP tumor-bearing mice 12 days following HBSS injection or tumor implantation.

E. Quantification of myeloid cells within the spleen of control or E0771-GFP tumor-bearing mice 12 days following HBSS injection or tumor implantation ( $n=4$  mice per group).

F. Suppression of T cell division by MDSCs isolated from spleen of control mice or spleen of tumor-bearing mice implanted with E0771 for 12 days ( $n=3$  replicates per group).  $*P<0.05$ ;  $**P<0.005$ ;  $***P<0.005$ .

**Supplementary Figure 5** Myeloid subsets in pre/early metastatic lung.

A. C57Bl/6 mice that had received a bone marrow transplant from GFP-transgenic mice were given no tumor or implanted with E0771 ffluc-mCherry for the indicated time.

Percentage of GFP<sup>+</sup> cells expressing the indicated lineage markers in lung are presented.

(*n*=3 mice per group)

B-C. Quantification of CD11b<sup>+</sup>Ly6g<sup>+</sup> cells per lung of control or E0771 BCA tumor-bearing mice (B) or M3-9-M ERMS tumor-bearing mice (C) at the indicated times following tumor implantation. (*n*=5 for no tumor mice; *n*=5-6 for each tumor-bearing mouse group)

D-E. Quantification of CD11b<sup>+</sup>Ly6c<sup>high</sup> cells per lung of control or E0771 BCA tumor-bearing mice (D) or M3-9-M ERMS tumor-bearing mice (E) at the indicated times following tumor implantation. (*n*=5 for no tumor mice; *n*=5-6 for each tumor-bearing mouse group)

F-G. Quantification of CD11c<sup>+</sup> cells (F) or CD11b<sup>+</sup>Ly6c<sup>high</sup>F4/80<sup>+</sup>CD115<sup>+</sup> cells (G) per lung of control or M3-9-M ERMS tumor-bearing mice at the indicated times following tumor implantation. (*n*=5 for no tumor mice; *n*=5-6 for each tumor-bearing mouse group)

H-I. Quantification of CD11b<sup>+</sup>Ly6c<sup>high</sup>CD206<sup>+</sup>CD115<sup>+</sup> cells (F) or CD11b<sup>+</sup>Ly6c<sup>high</sup>CD80<sup>+</sup> cells per lung of control or E0771 BCA tumor-bearing mice at the indicated times following tumor implantation. (*n*=3 for no tumor mice; *n*=3 for each tumor-bearing mouse group)

**Supplementary Figure 5** *Ex vivo* tumor-mediated bone marrow expansion.

A-D. Lineage-depleted bone marrow was incubated with StemSpan, E0771 tumor-conditioned StemSpan, or M3-9-M tumor-conditioned StemSpan that was heated to the indicated temperature for 30 minutes. The indicated cell types were quantified by flow cytometry after 7 days of *ex vivo* culture. (*n*=2 wells per condition)

E. Lineage-depleted bone marrow was incubated with StemSpan, E0771 tumor-conditioned StemSpan, or M3-9-M tumor-conditioned StemSpan. Cultures were supplemented with FLT3 ligand at 5, 10, 25, or 50ng/mL. LSK cells were quantified by flow cytometry after 7 days of *ex vivo* culture. (*n*=2 wells per condition)
