# Supplementary material
Source: PubMed Central journal article supplement (PMC4794356)

# Supplementary Figure 1

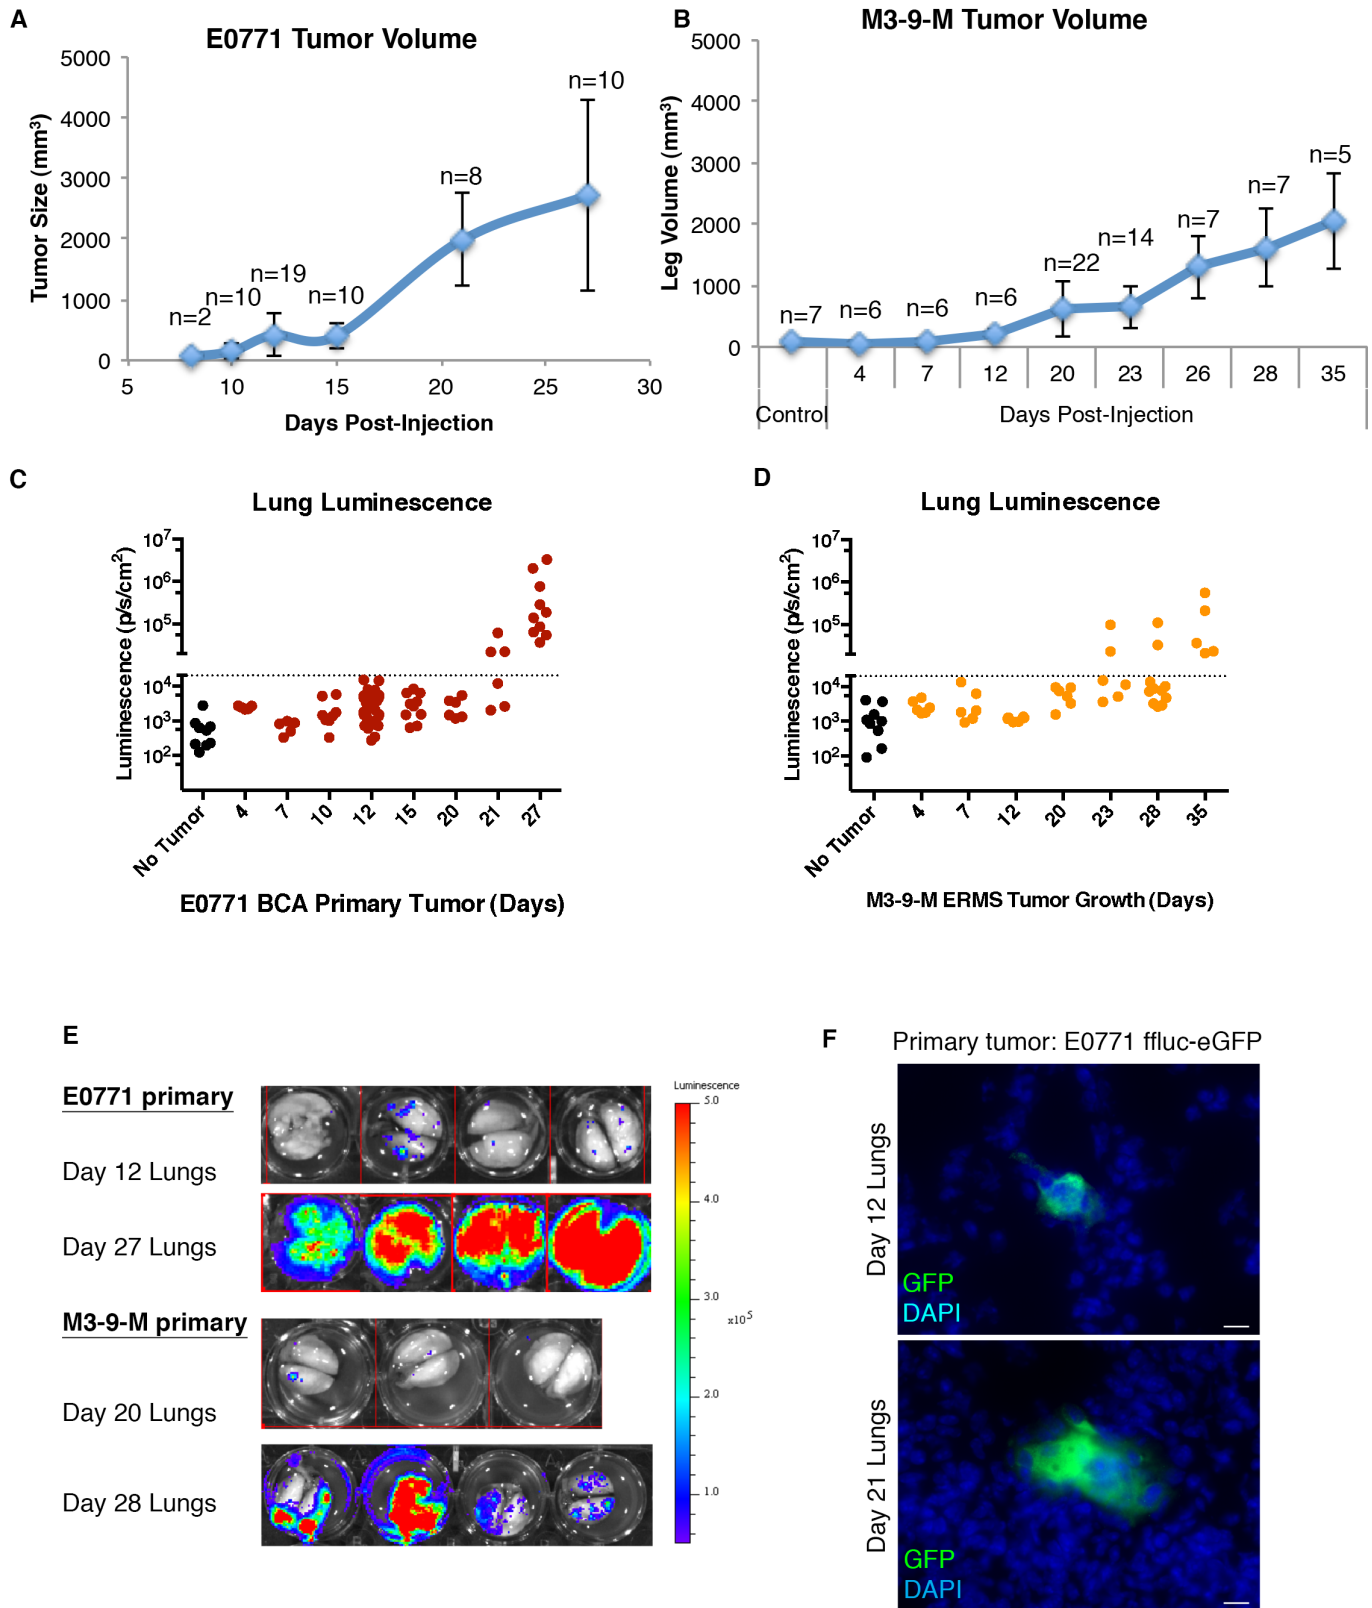

Supplement: NIHMS747708-supplement-2.pdf [file NIHMS747708-supplement-2.pdf]

## Supplementary Figure 2

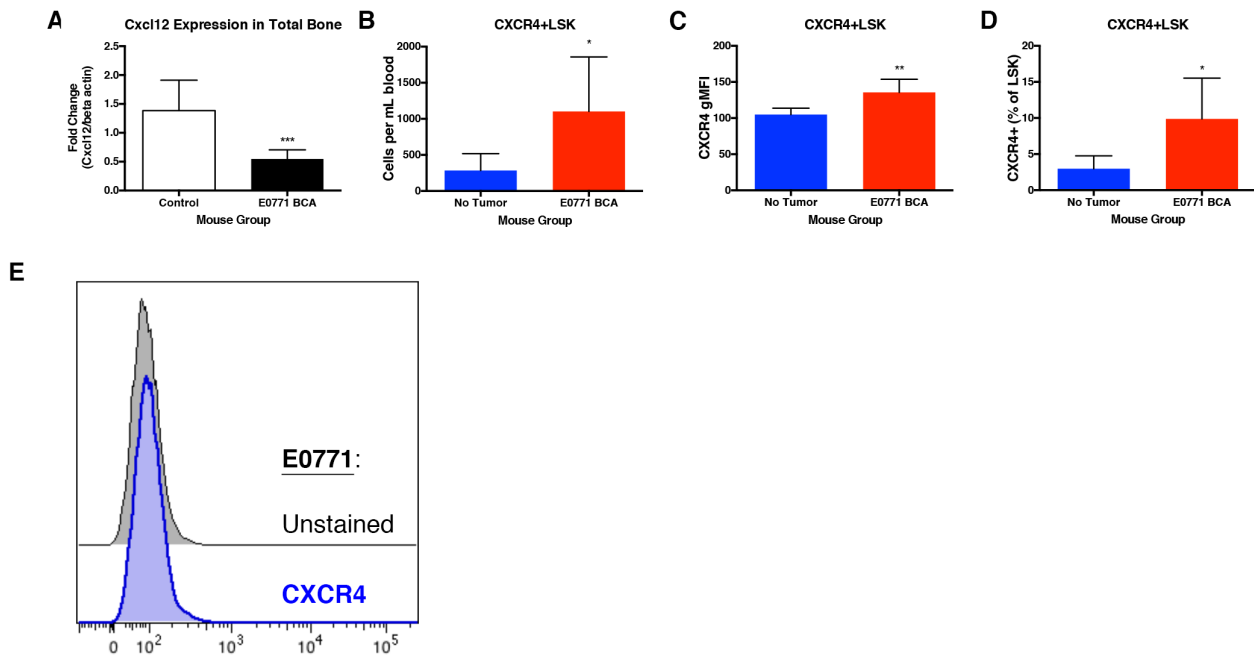

Supplement: NIHMS747708-supplement-3.pdf [file NIHMS747708-supplement-3.pdf]

### Supplementary Figure 3

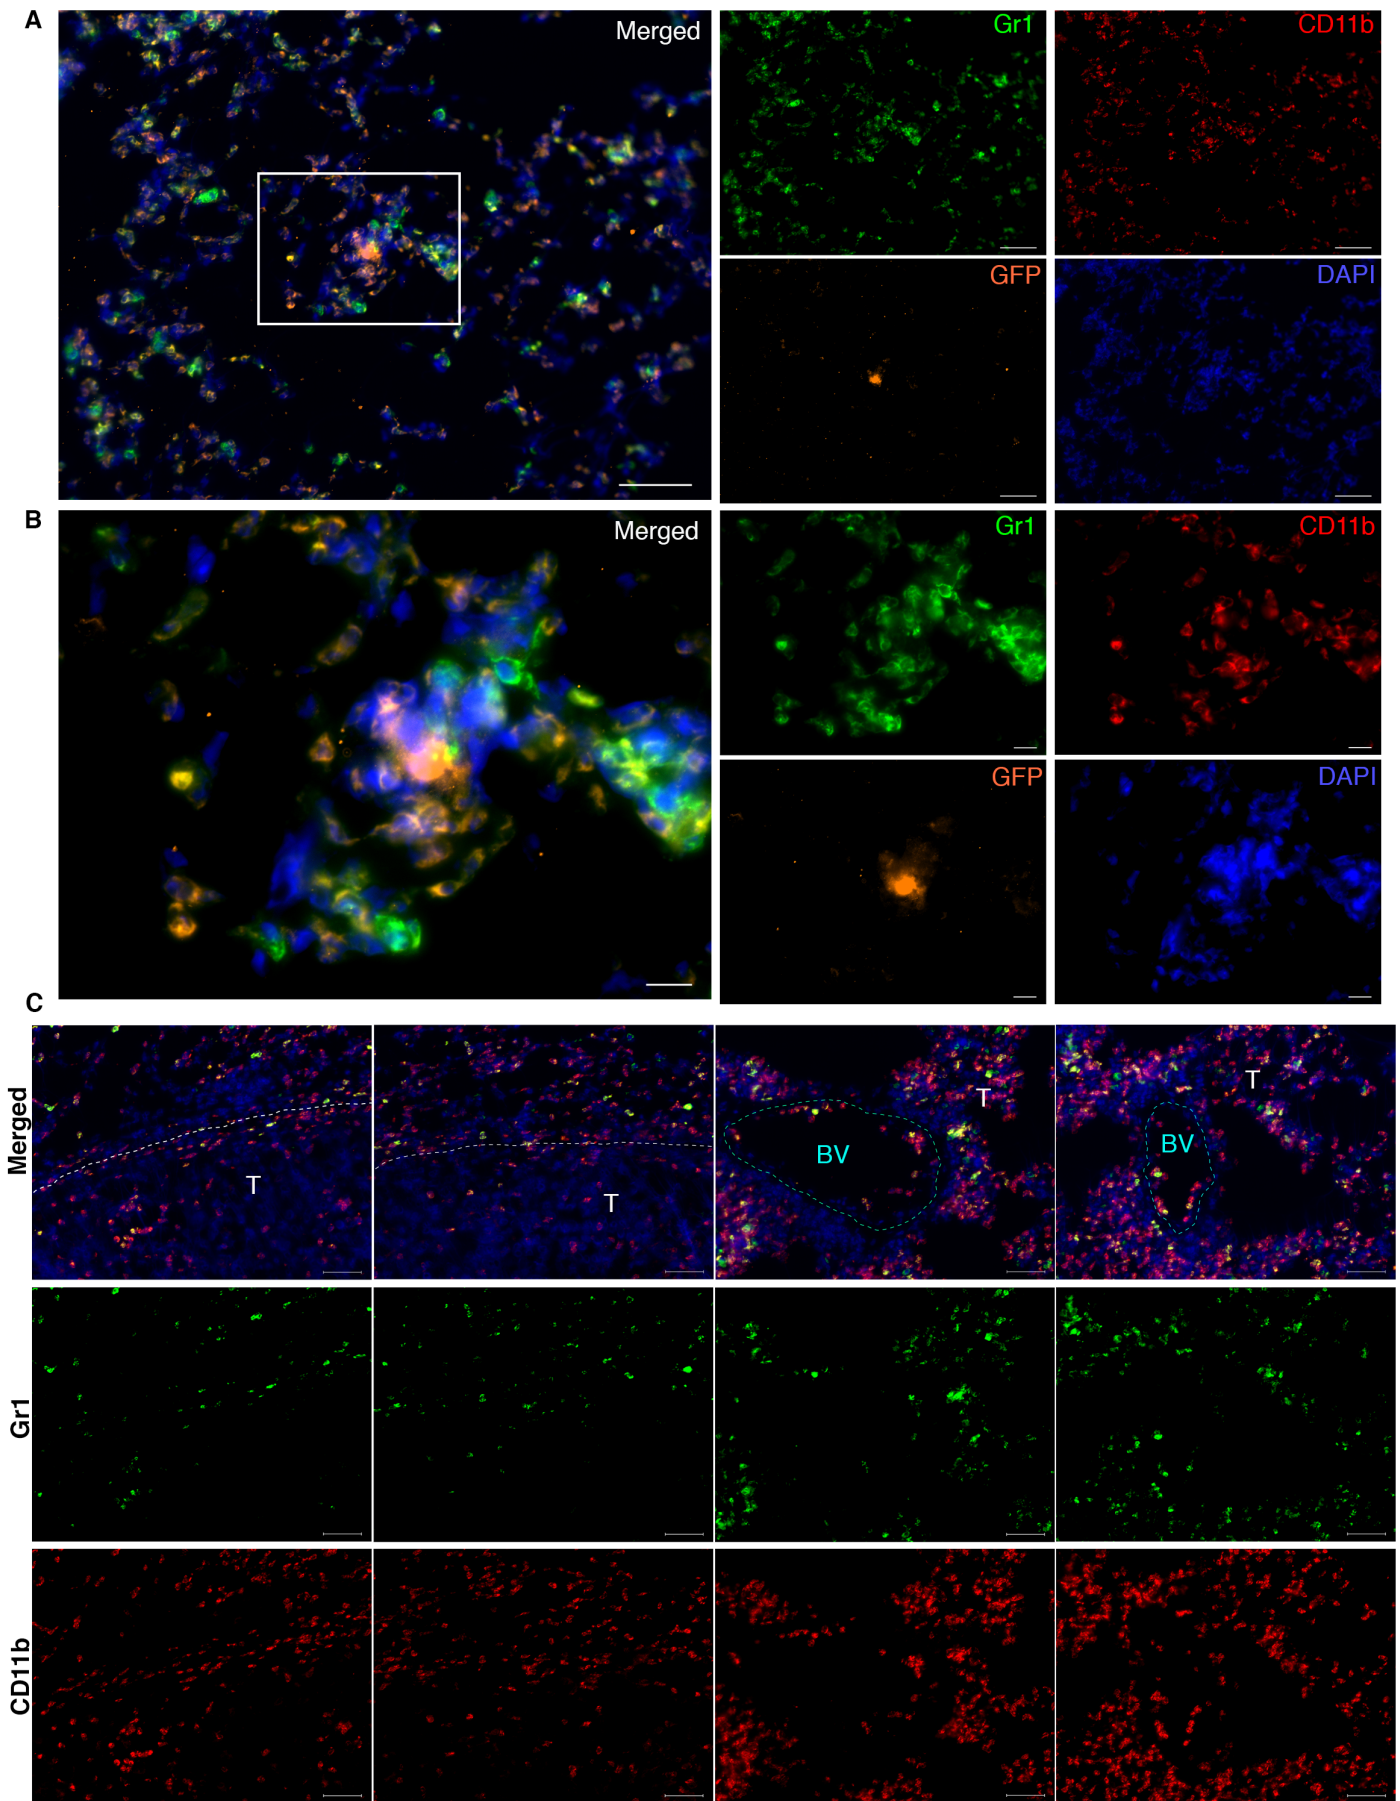

Supplement: NIHMS747708-supplement-4.pdf [file NIHMS747708-supplement-4.pdf]

# Supplementary Figure 4

**A** E0771-GFP Primary Tumor

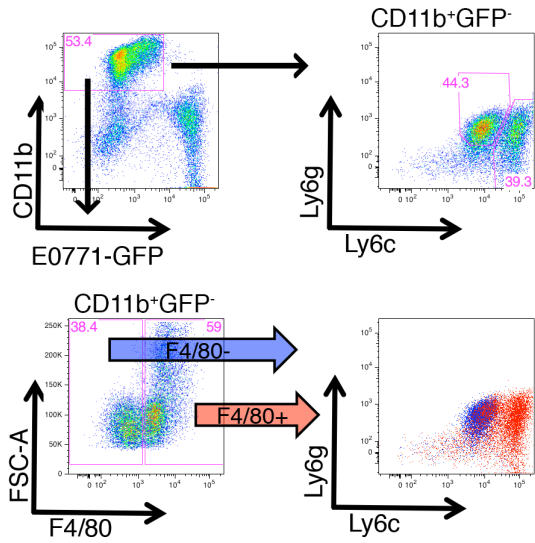

**B** E0771 Tumor Day 12

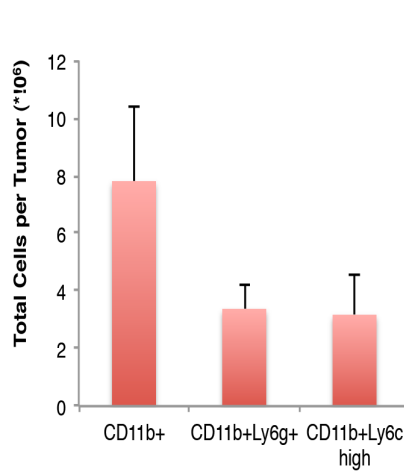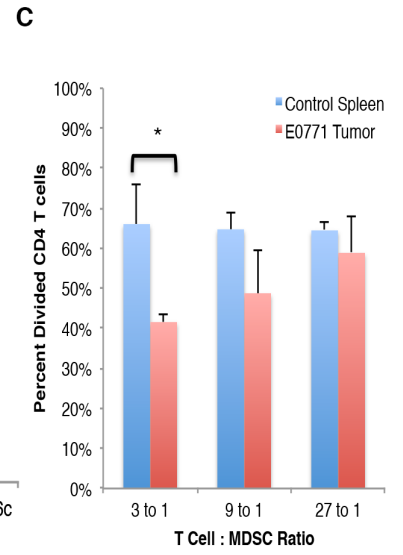

**D** Control Spleen

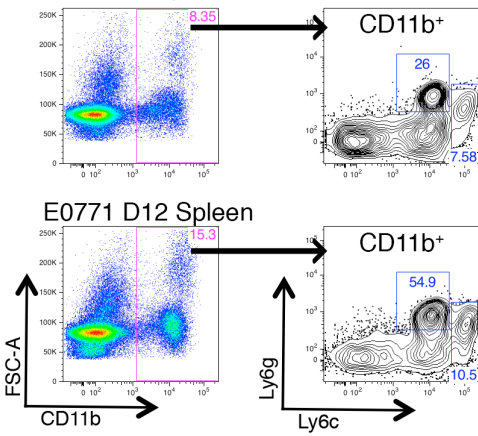

**E** E0771 Myeloid Spleen

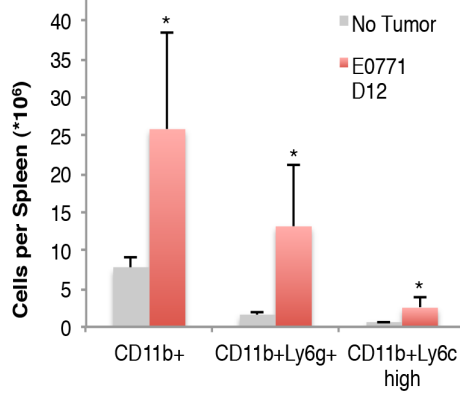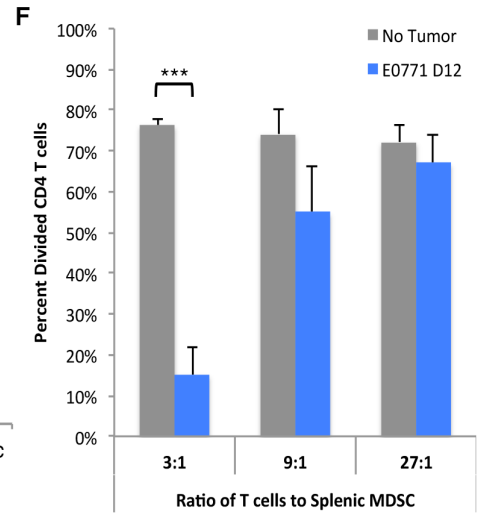

Supplement: NIHMS747708-supplement-5.pdf [file NIHMS747708-supplement-5.pdf]

# Supplementary Figure 5

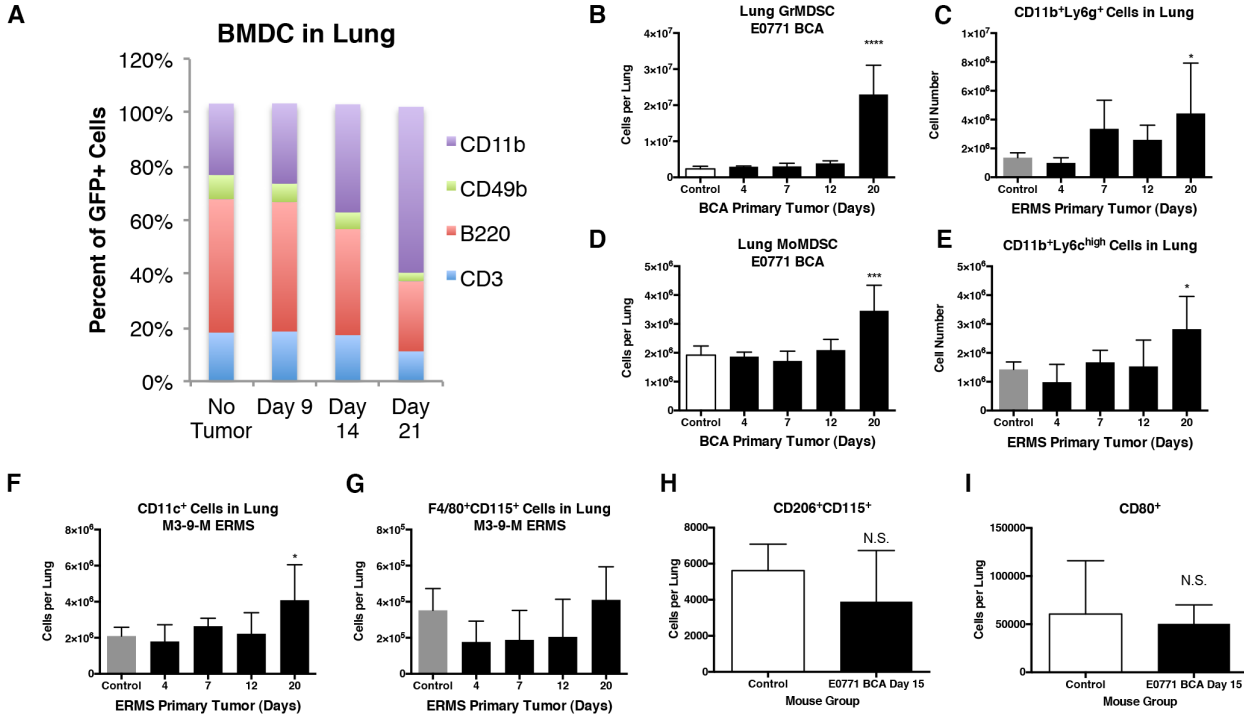

Supplement: NIHMS747708-supplement-6.pdf [file NIHMS747708-supplement-6.pdf]

# Supplementary Figure 6

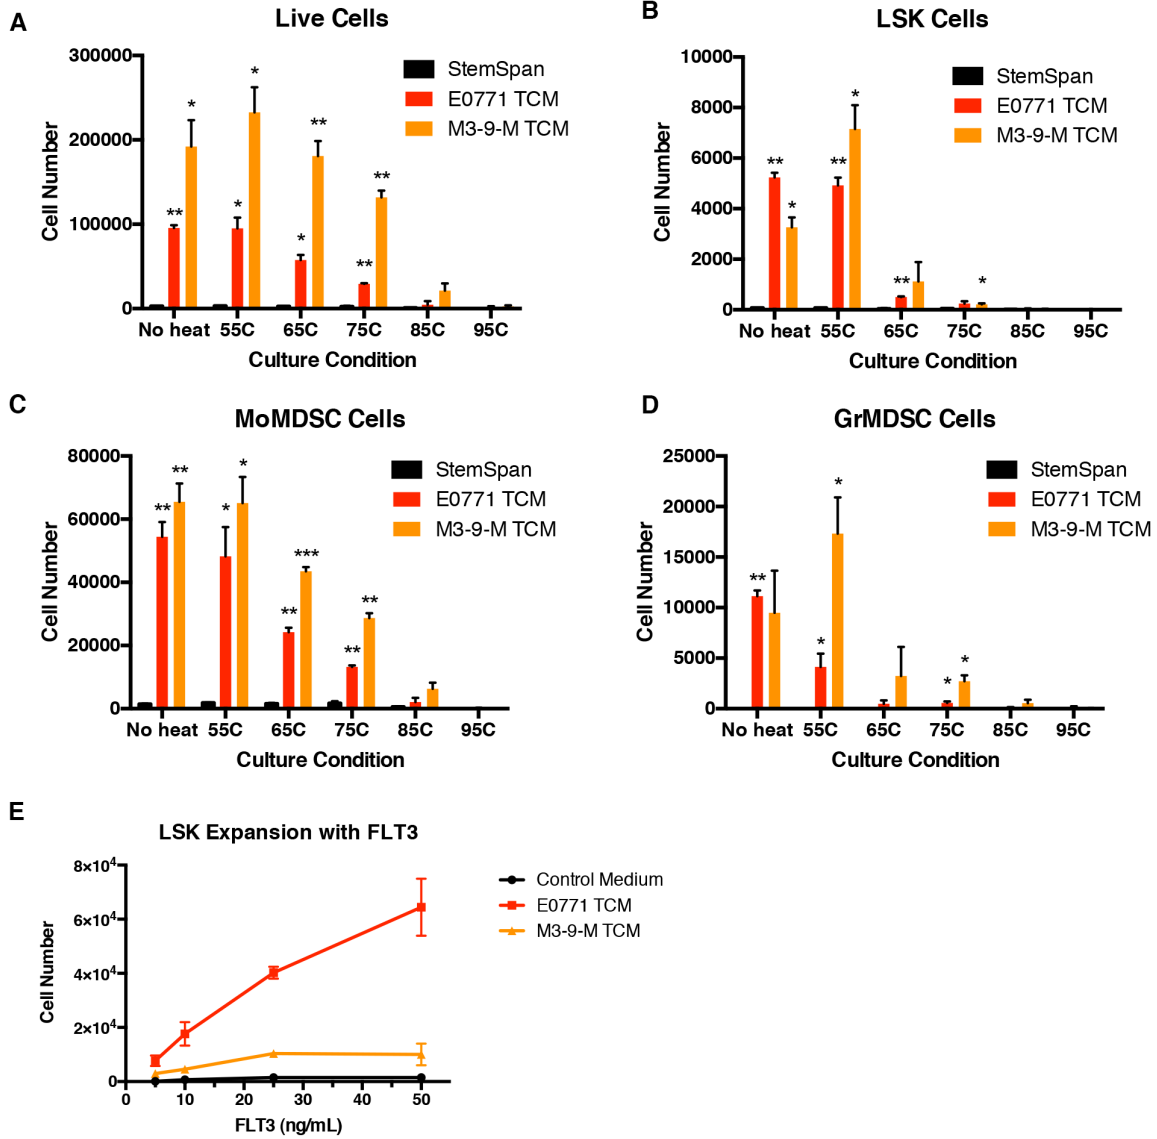

Supplement: NIHMS747708-supplement-7.pdf [file NIHMS747708-supplement-7.pdf]
